# Supplementary material for: Human lymph-node CD8+ T cells display an altered phenotype during systemic autoimmunity
Source: PubMed Central journal article supplement (PMC4855272; doi:10.1038/cti.2016.8), 2016-04-01

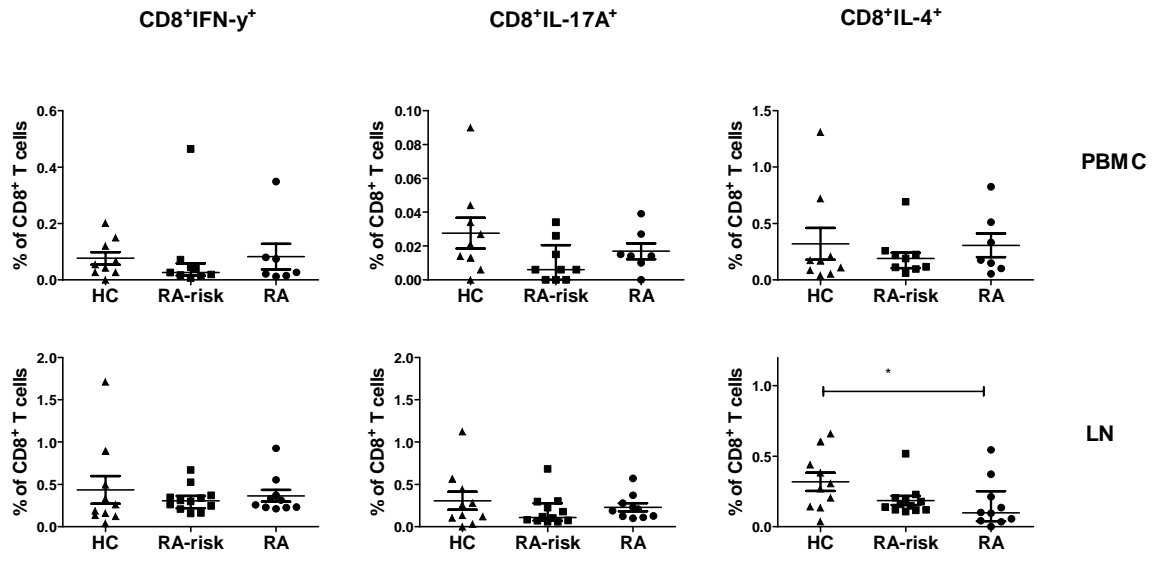

Supplement: cti20168x3.pdf [file cti20168x3.pdf]
